# Supplementary material for: Stabilization of propene molybdenum and tungsten half–sandwich complexes by intramolecular coordination of a thioether function
Source: Royal Society of Chemistry journal article supplement (doi:10.1039/d3ra03383j), 2023-01-01
Supplement: d3ra03383j1.pdf [file d3ra03383j1.pdf]

Supporting Information for:

**Stabilization of propene complexes by intramolecular coordination of thioether  
function**

Lukáš Hanzl,<sup>a</sup> Jaromír Vinklár, <sup>a</sup> Libor Dostál,<sup>a</sup> Ivana Císařová,<sup>b</sup> Miroslava Litecká <sup>c</sup>  
and Jan Honzíček <sup>\*d</sup>

<sup>a</sup>Department of General and Inorganic Chemistry, Faculty of Chemical Technology,  
University of Pardubice, Studentská 573, 532 10 Pardubice, Czech Republic.

<sup>b</sup>Department of Inorganic Chemistry, Faculty of Science, Charles University in Prague,  
Hlavova 2030/8, 128 43 Prague 2, Czech Republic.

<sup>c</sup>Department of Materials Chemistry, Institute of Inorganic Chemistry of the CAS,  
Husinec-Řež 1001, 25068 Řež, Czech Republic.

<sup>d</sup>Institute of Chemistry and Technology of Macromolecular Materials, Faculty of  
Chemical Technology, University of Pardubice, Studentská 573, 532 10 Pardubice,  
Czech Republic.

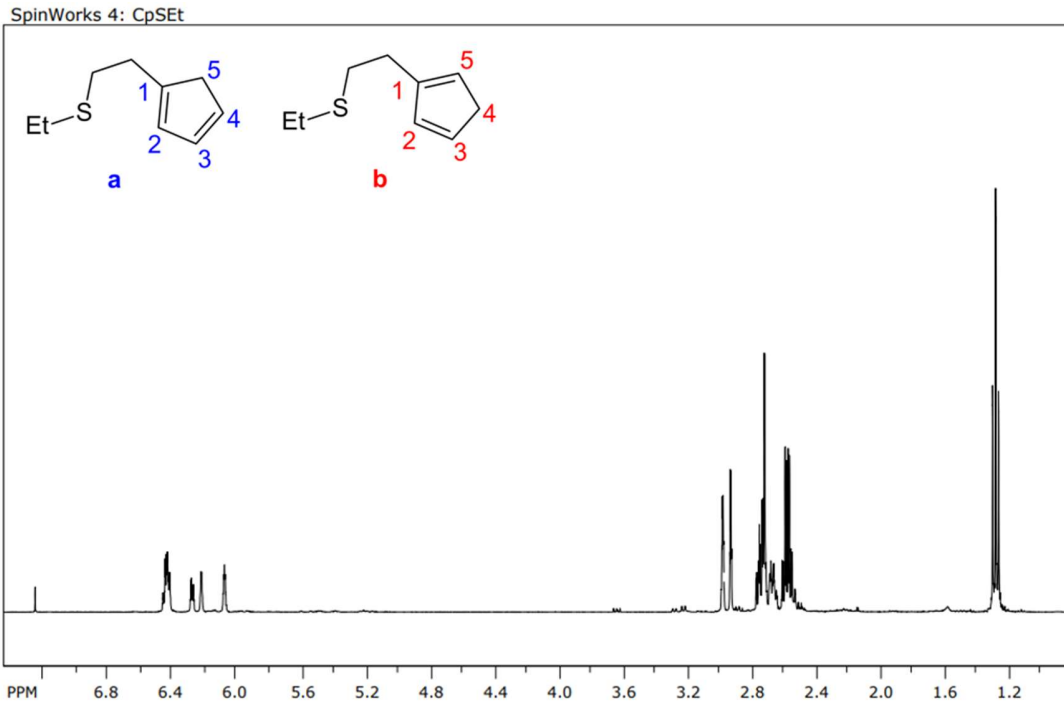

**Figure S1:**  $^1\text{H}$  NMR spectrum of  $\text{C}_5\text{H}_4(\text{CH}_2)_2\text{SEt}$  in  $\text{CDCl}_3$  (400 MHz)

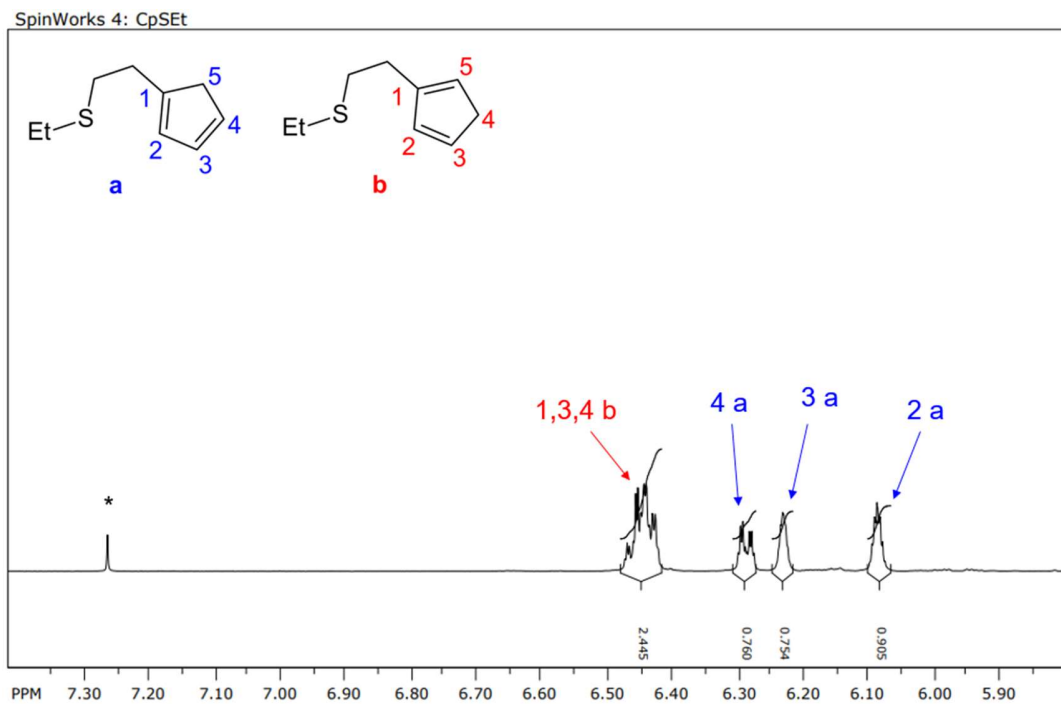

**Figure S2:**  $^1\text{H}$  NMR spectrum of  $\text{C}_5\text{H}_4(\text{CH}_2)_2\text{SEt}$  in  $\text{CDCl}_3$  (400 MHz), close-up of the aromatic section

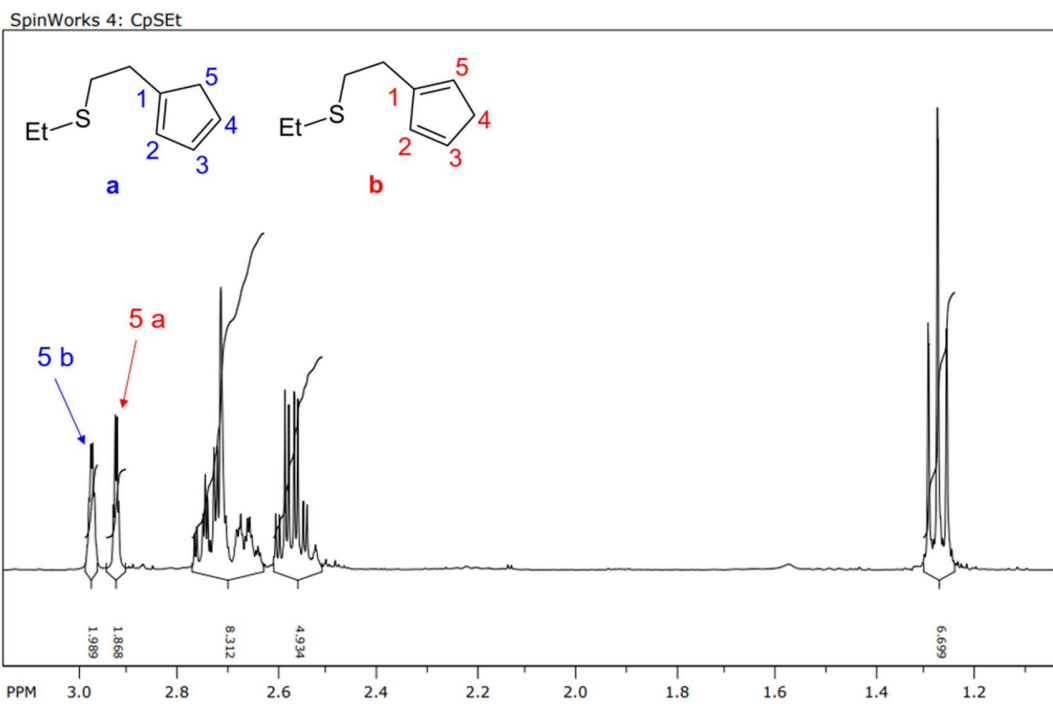

**Figure S3:**  $^1\text{H}$  NMR spectrum of  $\text{C}_5\text{H}_4(\text{CH}_2)_2\text{SEt}$  in  $\text{CDCl}_3$  (400 MHz), close-up of the aliphatic section

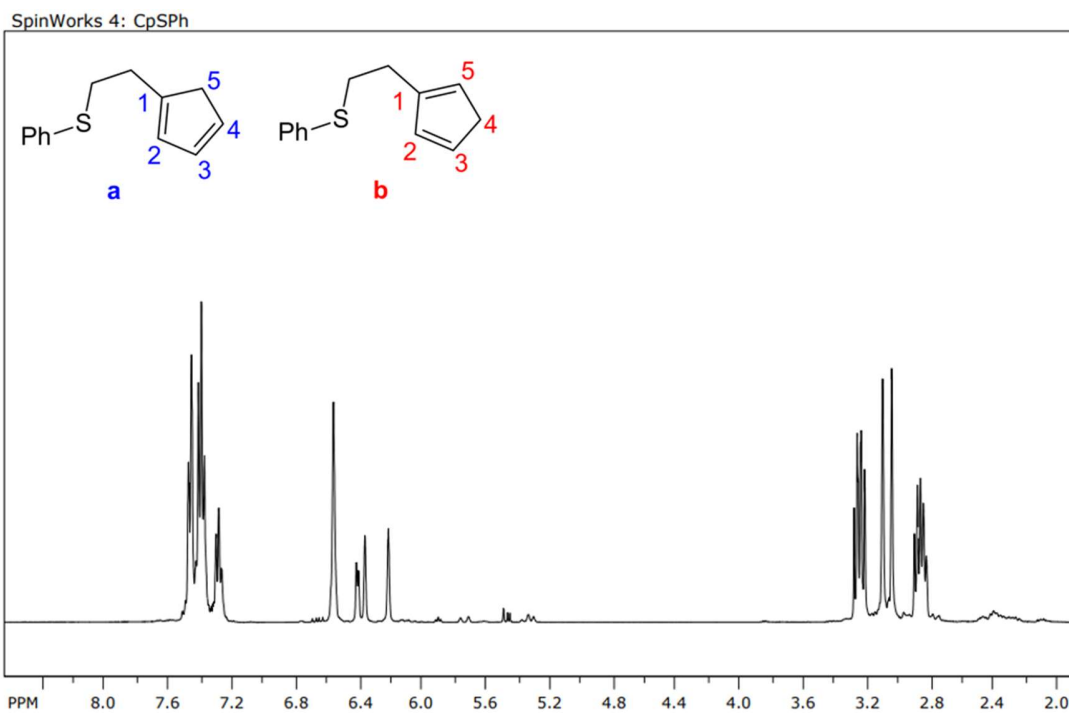

**Figure S4:**  $^1\text{H}$  NMR spectrum of  $\text{C}_5\text{H}_4(\text{CH}_2)_2\text{SPh}$  in  $\text{CDCl}_3$  (400 MHz)

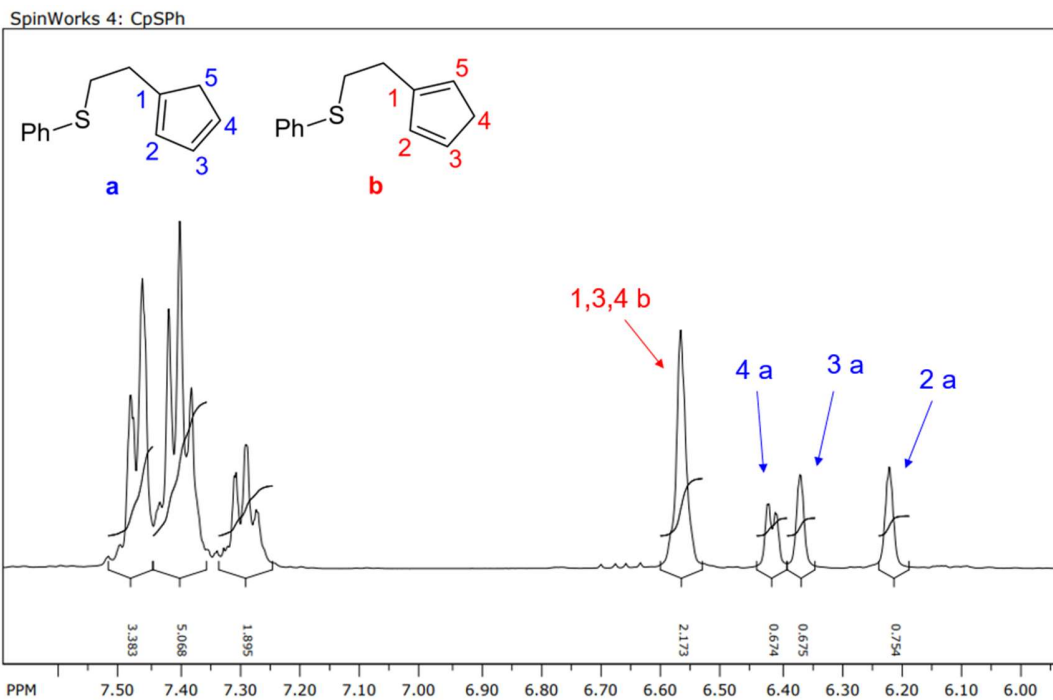

**Figure S5:**  $^1\text{H}$  NMR spectrum of  $\text{C}_5\text{H}_4(\text{CH}_2)_2\text{SPh}$  in  $\text{CDCl}_3$  (400 MHz), close-up of the aromatic section

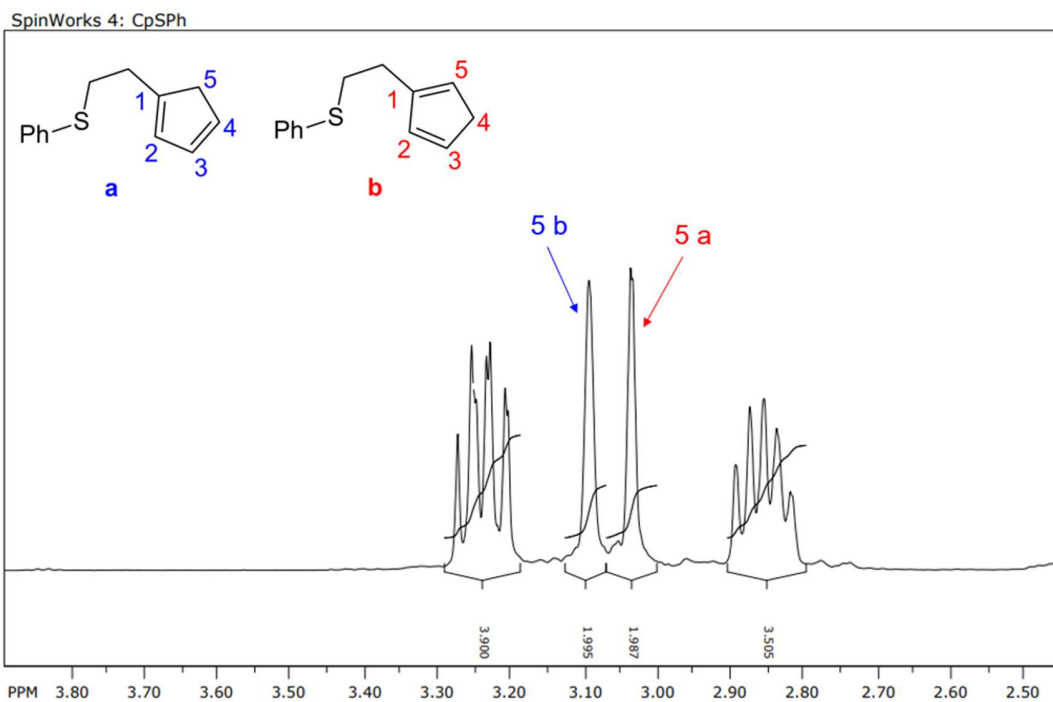

**Figure S6:**  $^1\text{H}$  NMR spectrum of  $\text{C}_5\text{H}_4(\text{CH}_2)_2\text{SPh}$  in  $\text{CDCl}_3$  (400 MHz), close-up of the aliphatic section

SpinWorks 4: 1

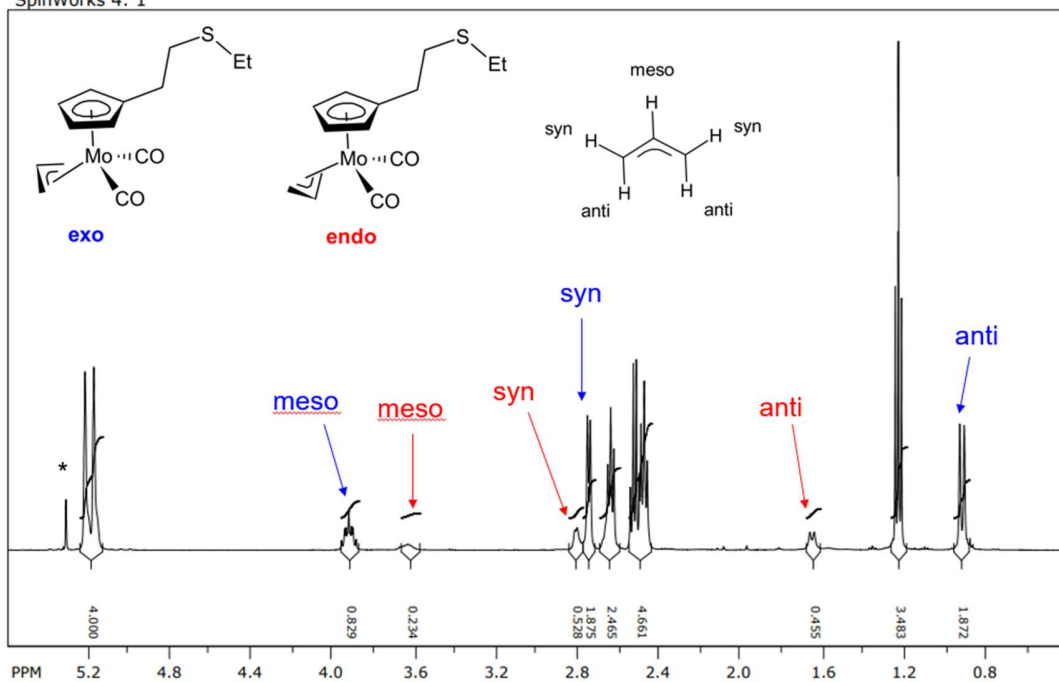

**Figure S7:**  $^1\text{H}$  NMR spectrum of **1** in  $\text{CD}_2\text{Cl}_2$  (500 MHz)

SpinWorks 4: 2

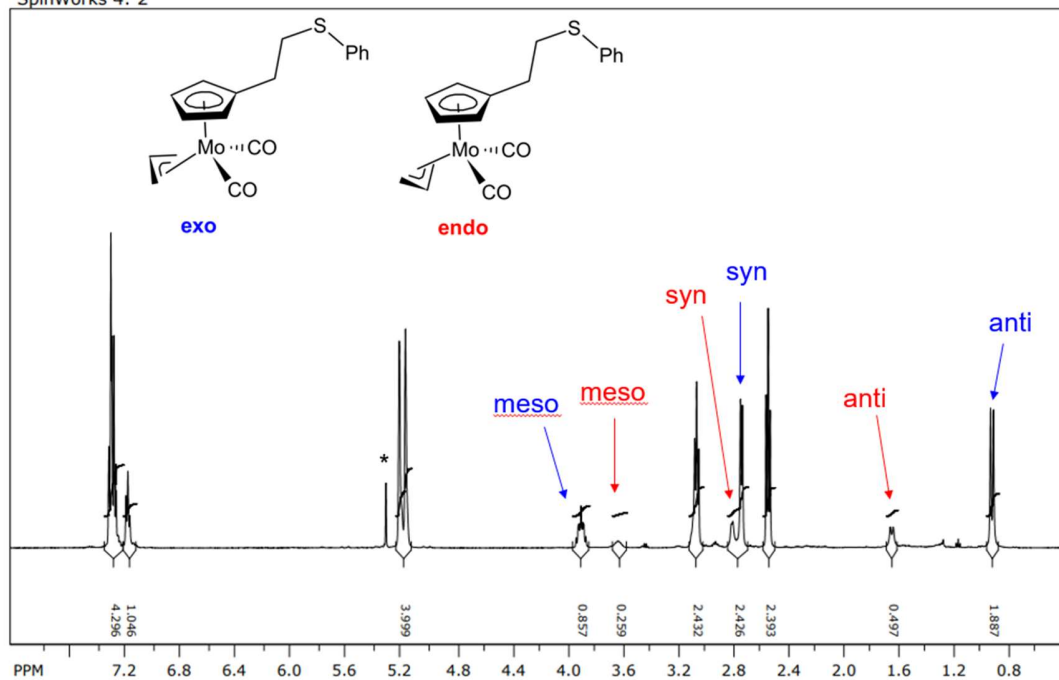

**Figure S8:**  $^1\text{H}$  NMR spectrum of **2** in  $\text{CD}_2\text{Cl}_2$  (500 MHz)

SpinWorks 4: 3

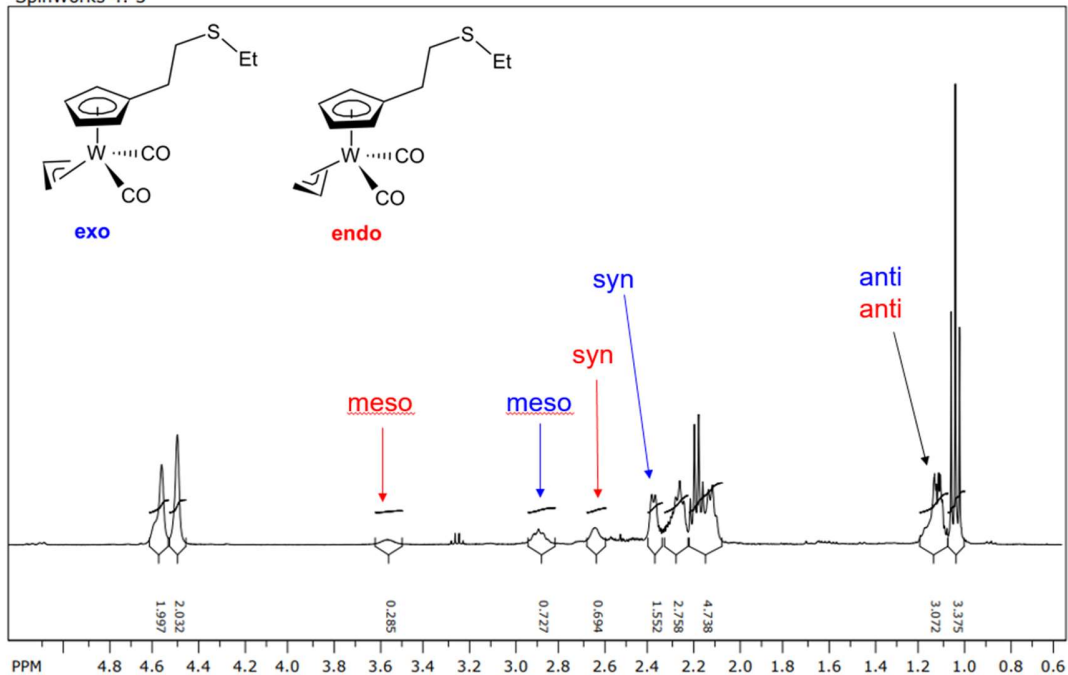

Figure S9:  $^1\text{H}$  NMR spectrum of **3** in  $\text{C}_6\text{D}_6$  (400 MHz)

SpinWorks 4: 4

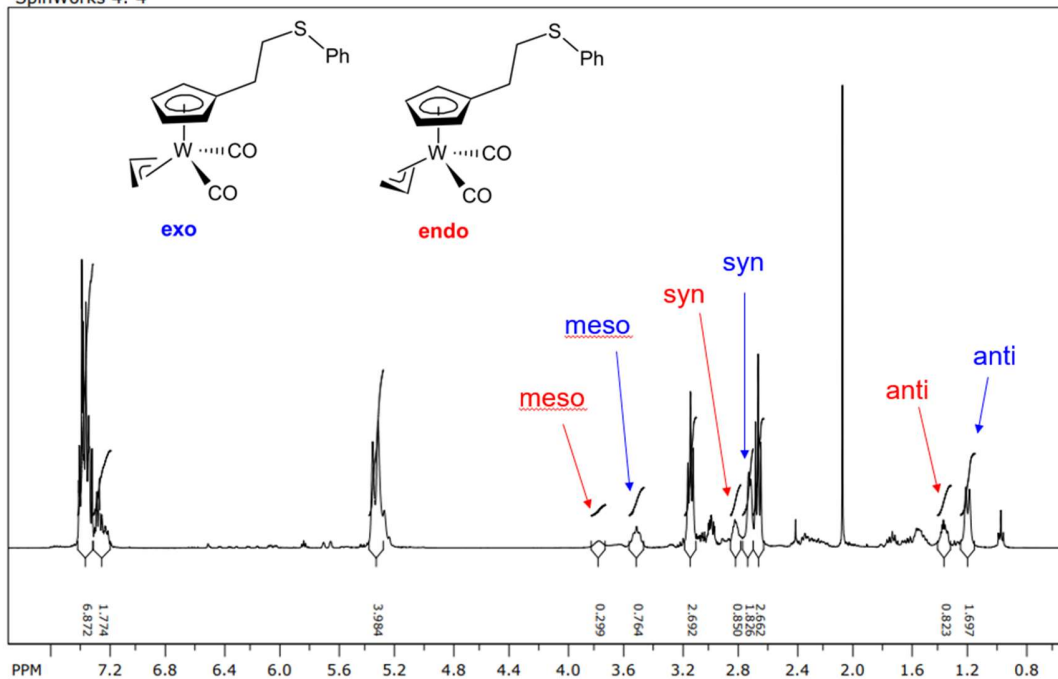

Figure S10:  $^1\text{H}$  NMR spectrum of **4** in  $\text{CDCl}_3$  (400 MHz)

SpinWorks 4: 5-1

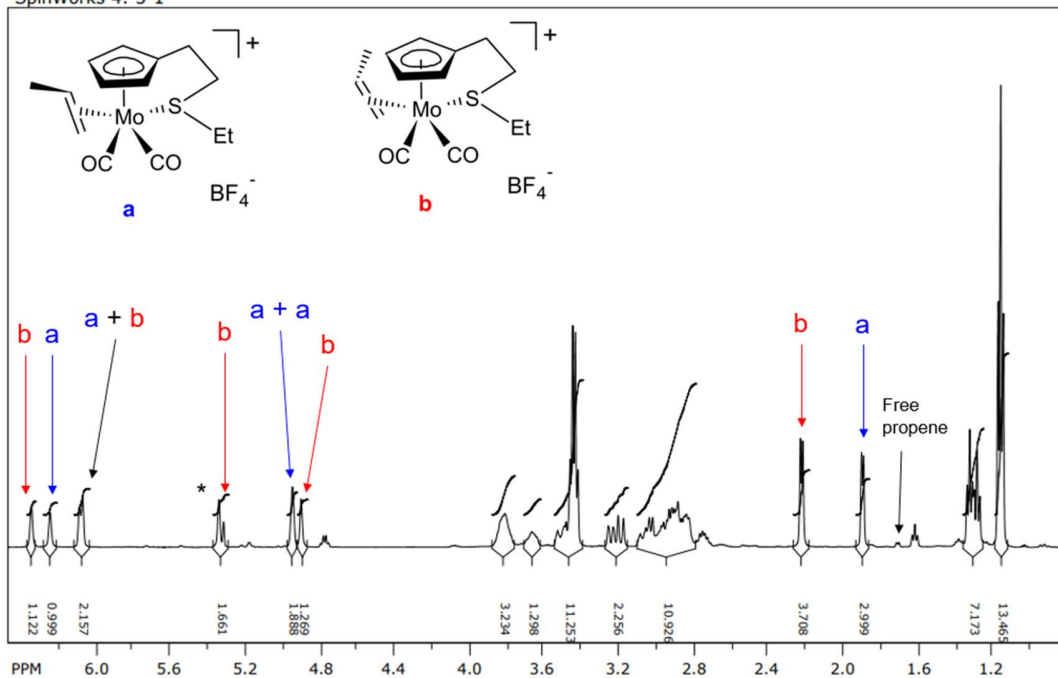

**Figure S11:**  $^1\text{H}$  NMR spectrum of **5** in  $\text{CD}_2\text{Cl}_2$  (500 MHz) measured directly after the preparation of the sample.

SpinWorks 4: 5-2

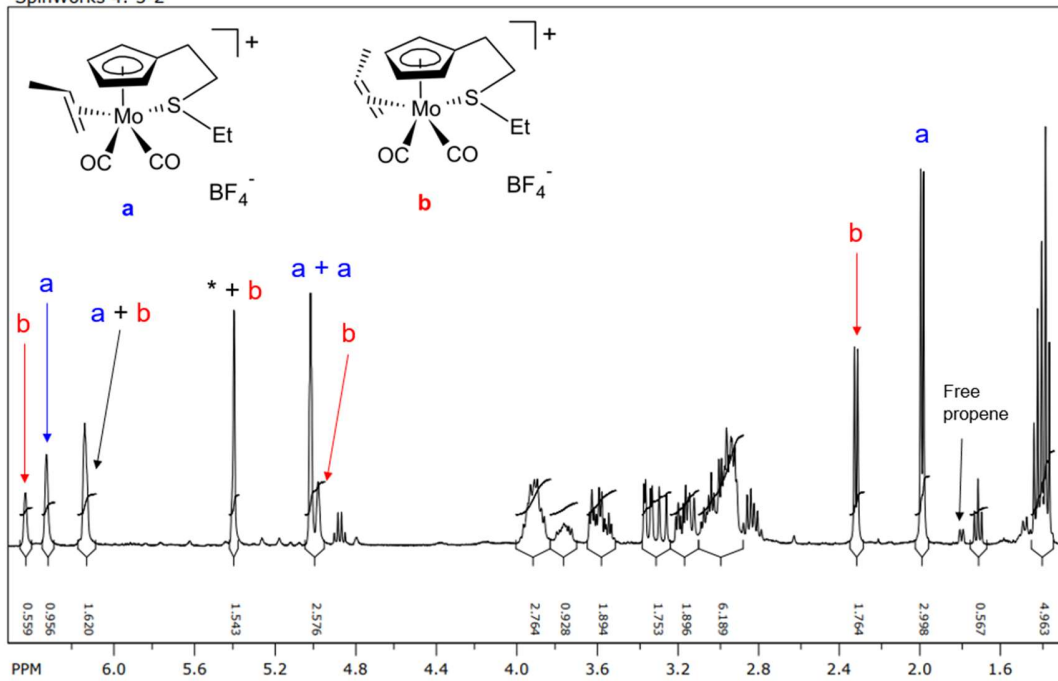

**Figure S12:**  $^1\text{H}$  NMR spectrum of **5** in  $\text{CD}_2\text{Cl}_2$  (500 MHz) measured after preparation with the internal standard.



SpinWorks 4: 5-3

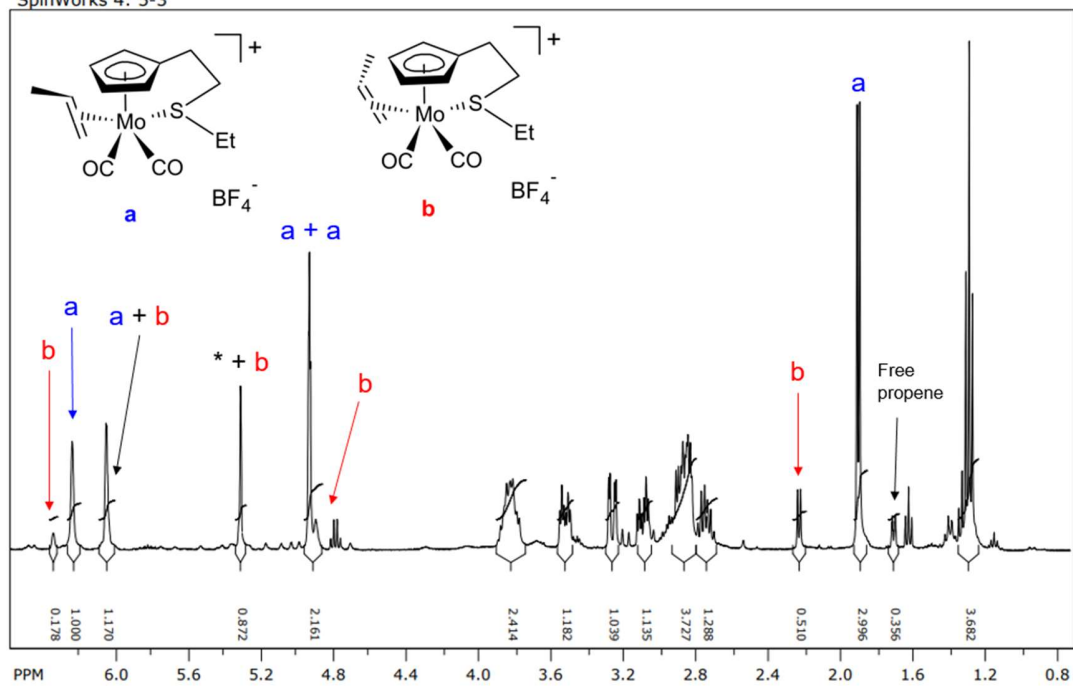

**Figure S13:**  $^1\text{H}$  NMR spectrum of **5** in  $\text{CD}_2\text{Cl}_2$  (500 MHz) measured after sitting at room temperature for two hours with the internal standard measured.

SpinWorks 4: 6-1

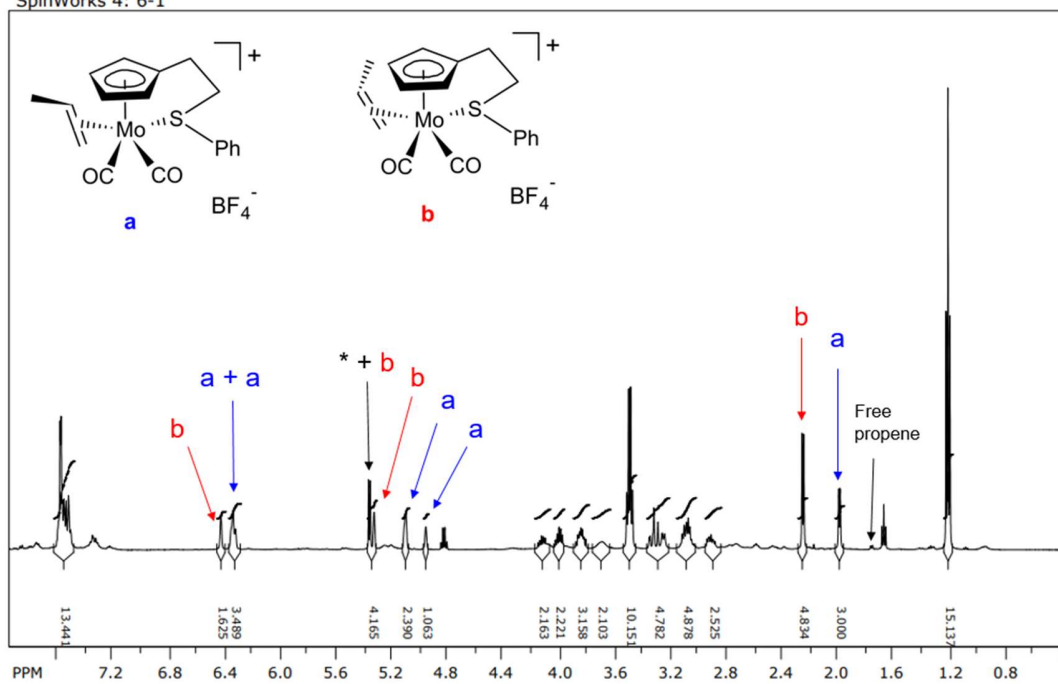

**Figure S14:**  $^1\text{H}$  NMR spectrum of **6** in  $\text{CD}_2\text{Cl}_2$  (500 MHz) measured directly after the preparation of the sample with the internal standard.

SpinWorks 4: 6-2

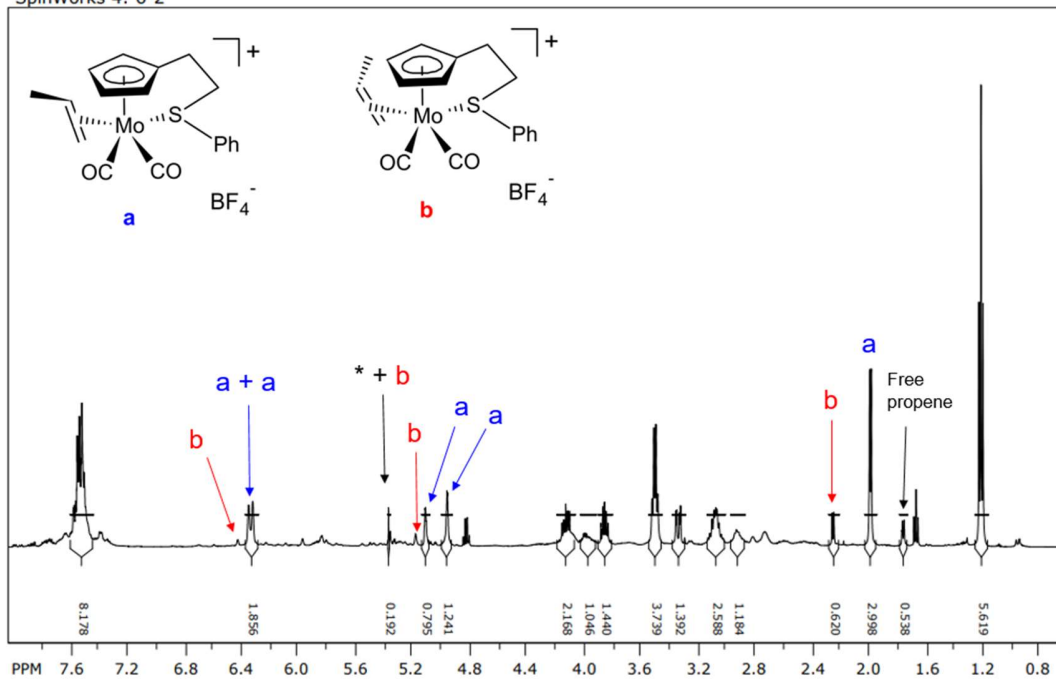

**Figure S15:**  $^1\text{H}$  NMR spectrum of **6** in  $\text{CD}_2\text{Cl}_2$  (500 MHz) measured after sitting at room temperature for two hours with the internal standard.

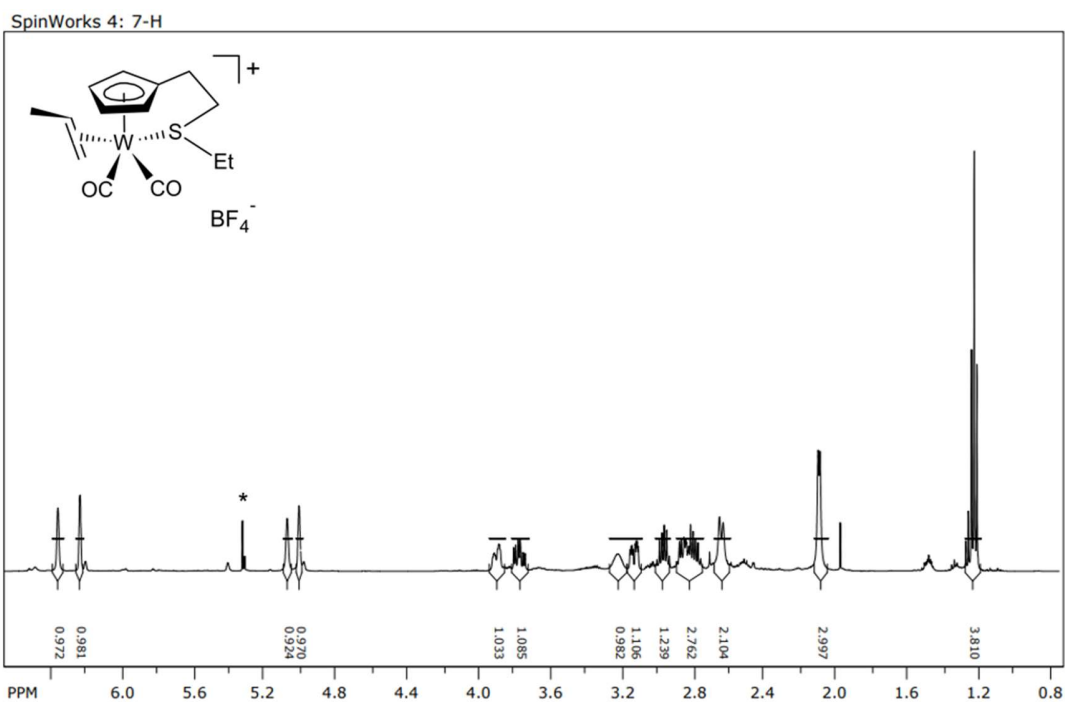

**Figure S16:** <sup>1</sup>H NMR spectrum of **7** in CD<sub>2</sub>Cl<sub>2</sub> (500 MHz).

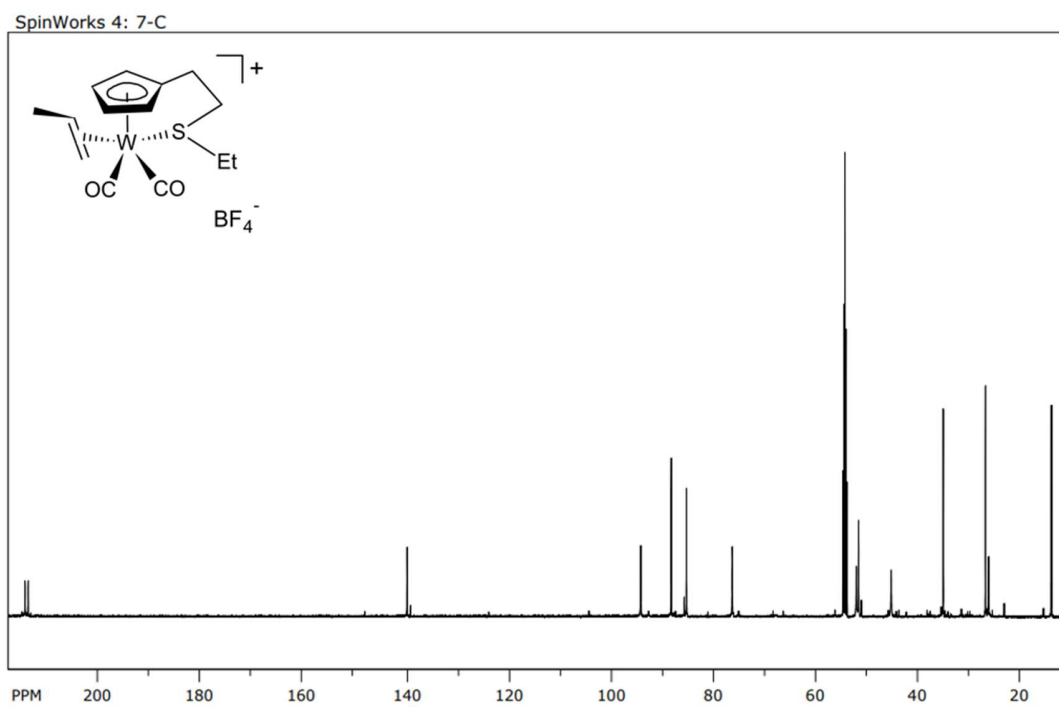

**Figure S17:** <sup>13</sup>C{<sup>1</sup>H} NMR spectrum of **7** in CD<sub>2</sub>Cl<sub>2</sub> (126 MHz).

SpinWorks 4: 8-H

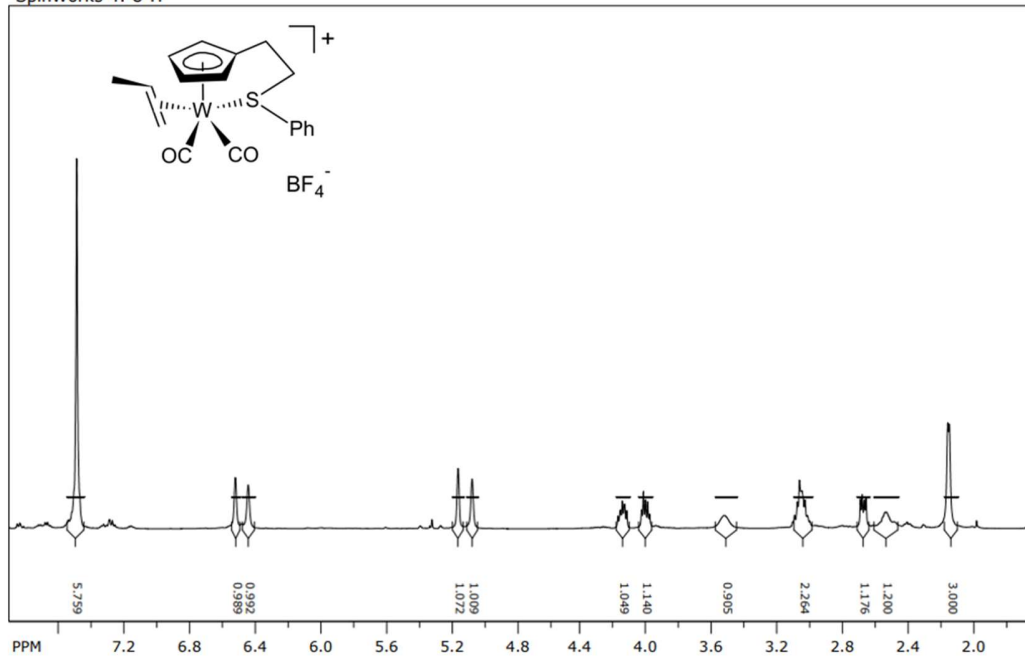

**Figure S18:**  $^1\text{H}$  NMR spectrum of **8** in  $\text{CD}_2\text{Cl}_2$  (500 MHz).

SpinWorks 4: 8-C

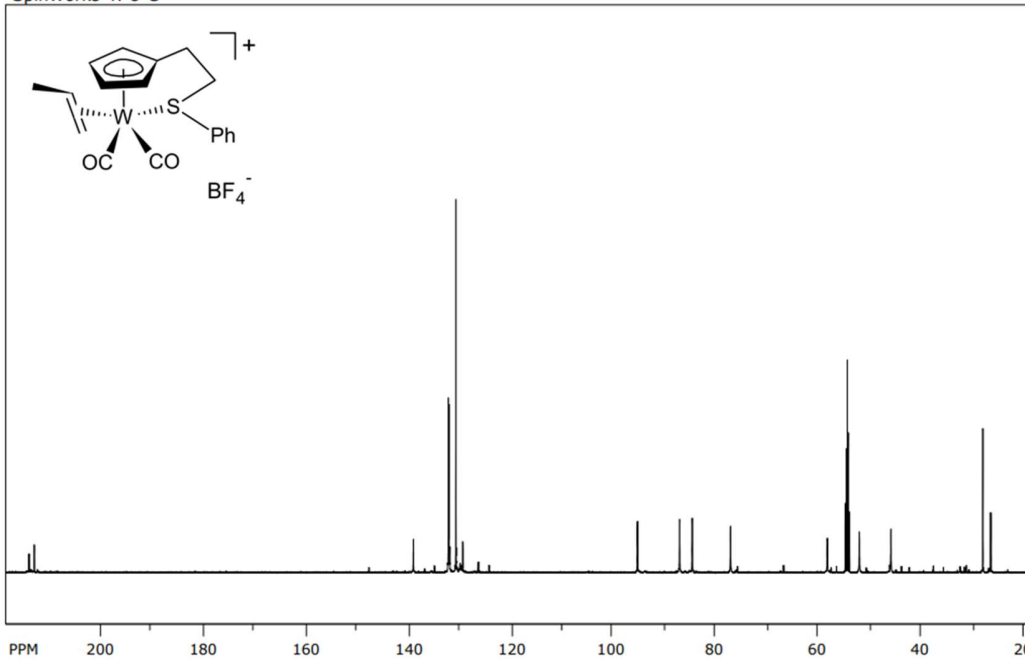

**Figure S19:**  $^{13}\text{C}\{^1\text{H}\}$  NMR spectrum of **8** in  $\text{CD}_2\text{Cl}_2$  (126 MHz).

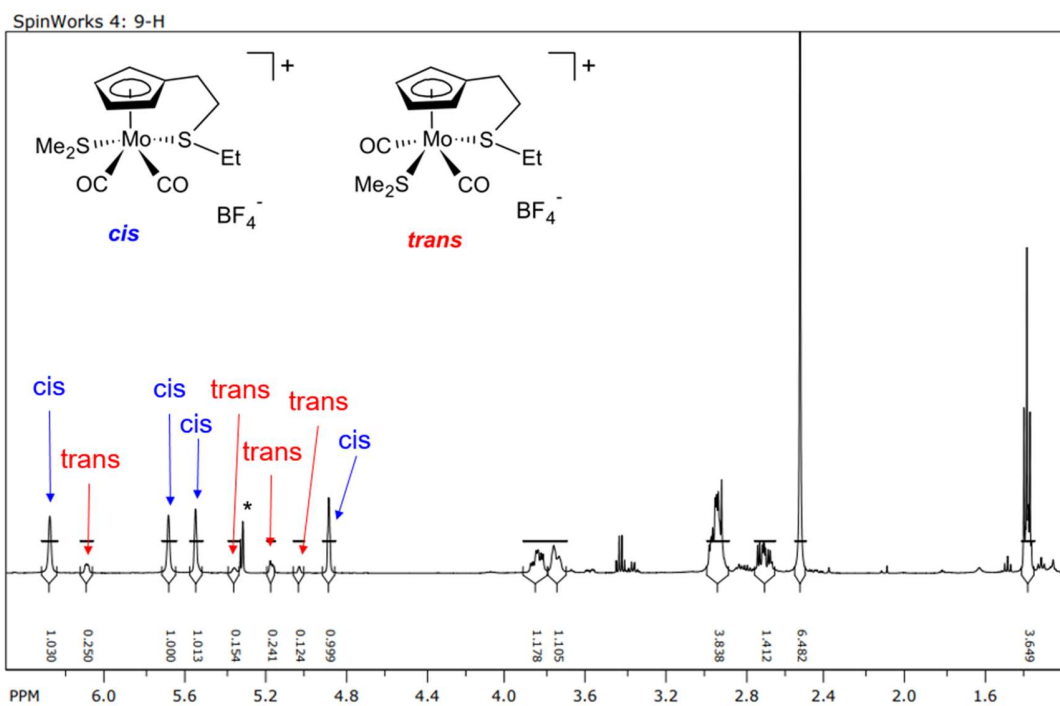

Figure S20:  $^1\text{H}$  NMR spectrum of **9** in  $\text{CD}_2\text{Cl}_2$  (500 MHz).

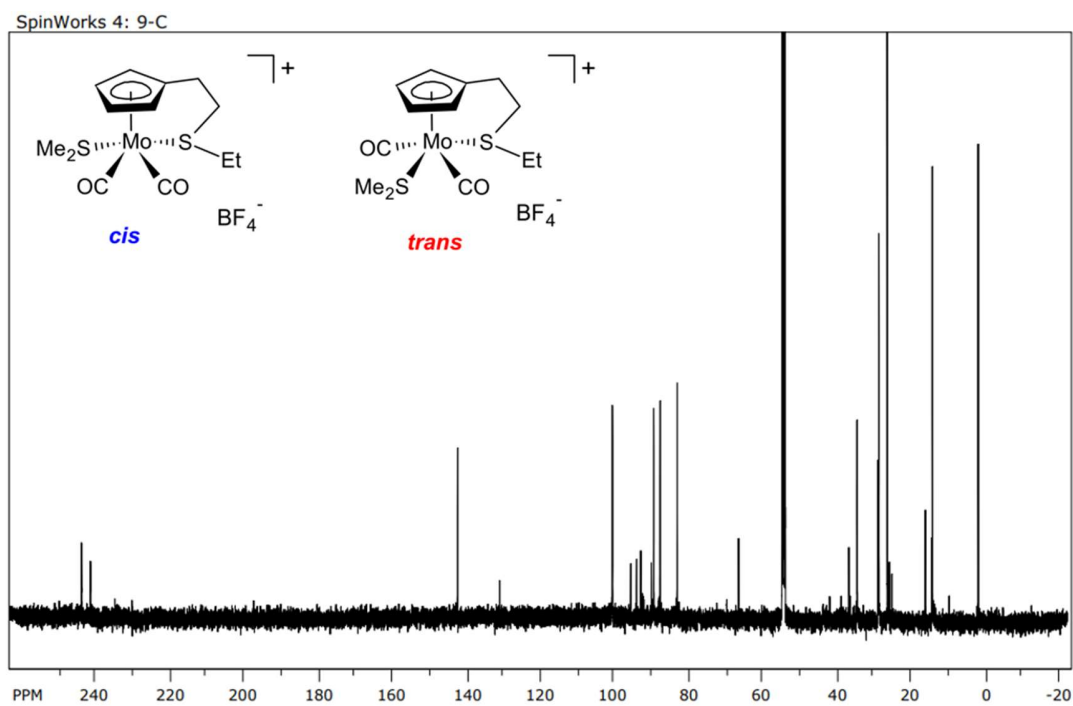

Figure S21:  $^{13}\text{C}\{^1\text{H}\}$  NMR spectrum of **9** in  $\text{CD}_2\text{Cl}_2$  (126 MHz).

SpinWorks 4: 10-H

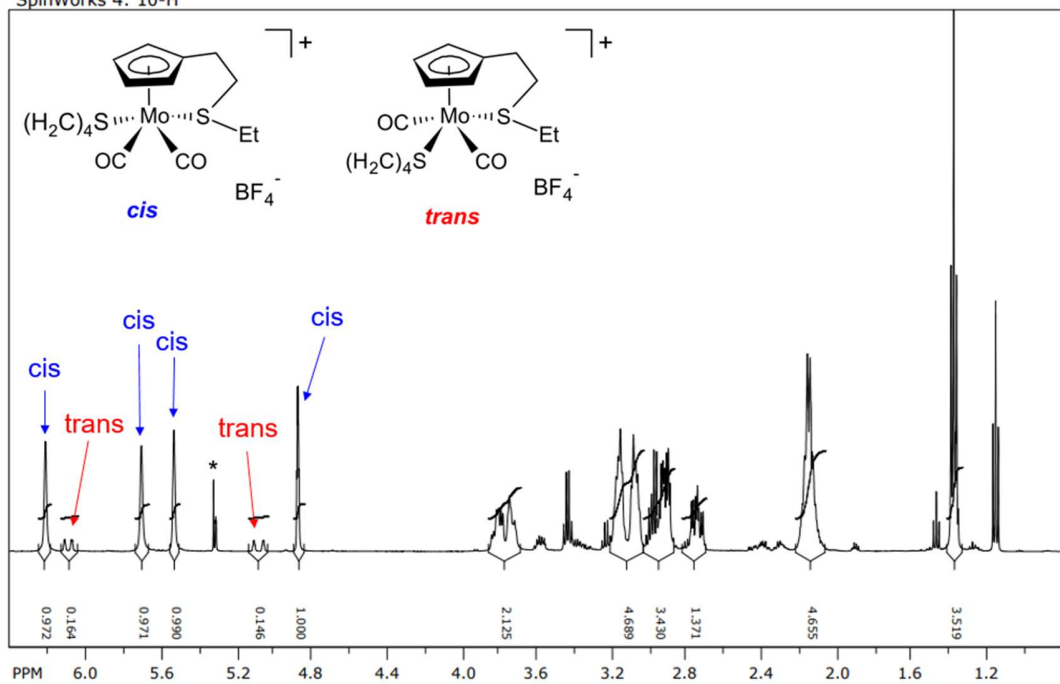

Figure S22:  $^1\text{H}$  NMR spectrum of **10** in  $\text{CD}_2\text{Cl}_2$  (500 MHz).

SpinWorks 4: 10-C

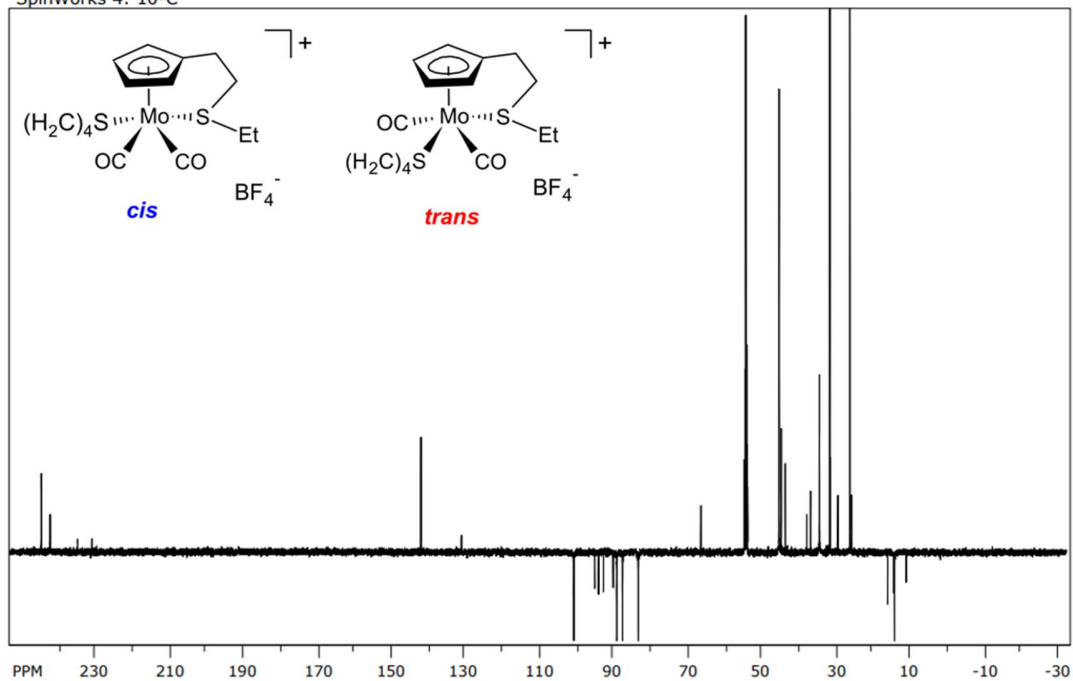

Figure 23:  $^{13}\text{C}$  APT NMR spectrum of **10** in  $\text{CD}_2\text{Cl}_2$  (126 MHz).

SpinWorks 4: 11-H

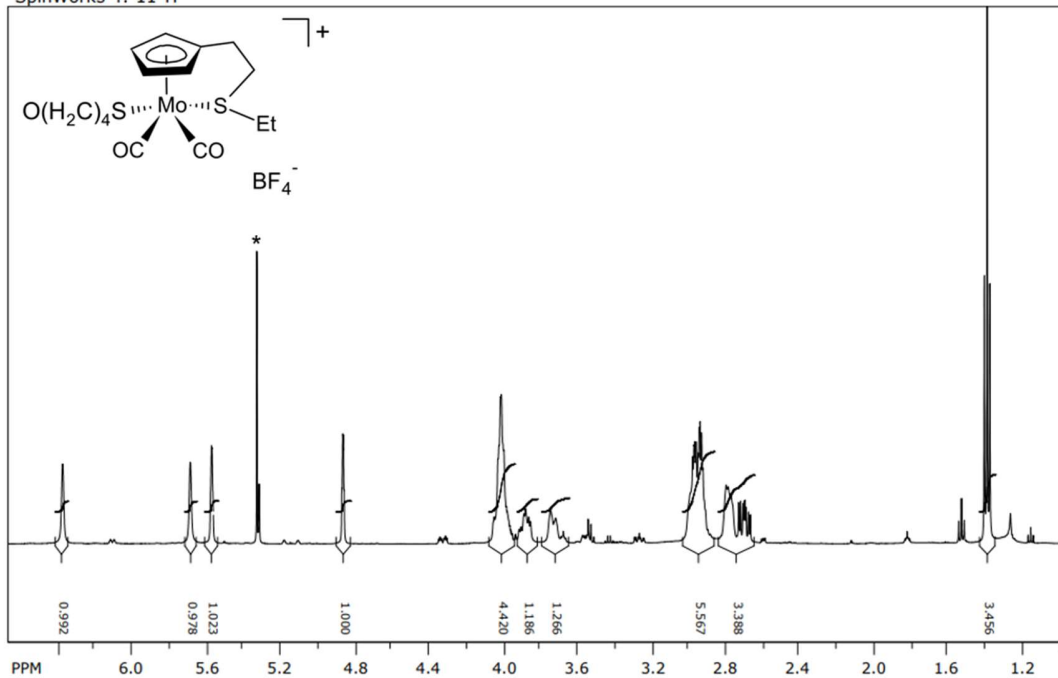

**Figure S24:** <sup>1</sup>H NMR spectrum of **11** in CD<sub>2</sub>Cl<sub>2</sub> (500 MHz).

SpinWorks 4: 11-C

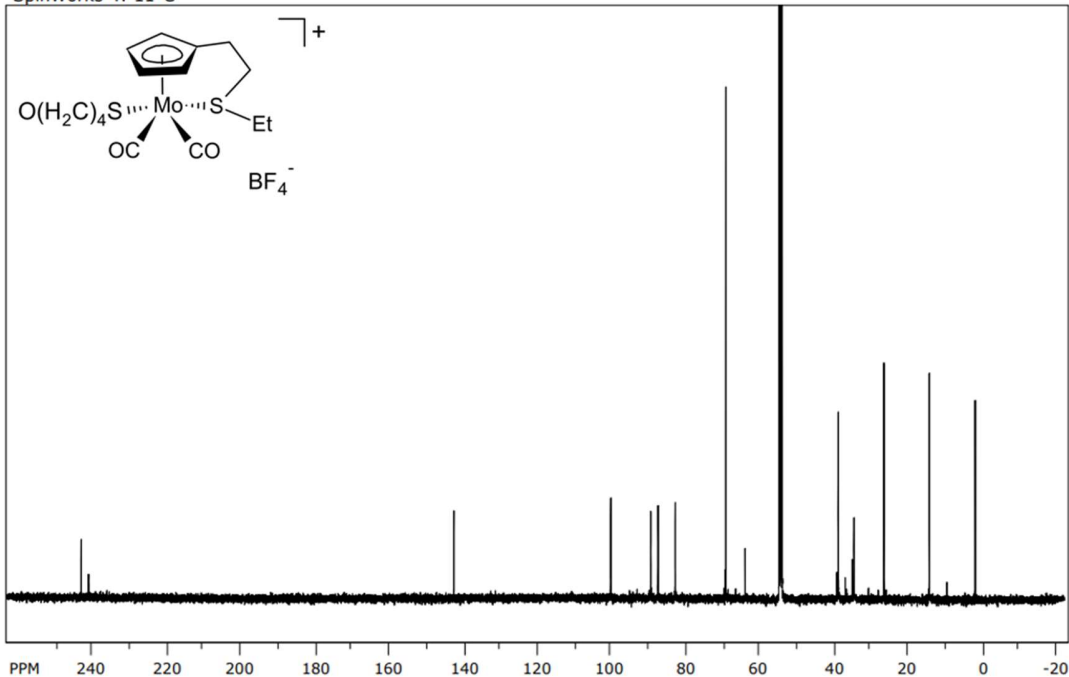

**Figure S25:** <sup>13</sup>C{<sup>1</sup>H} NMR spectrum of **11** in CD<sub>2</sub>Cl<sub>2</sub> (126 MHz).



SpinWorks 4: 12-H

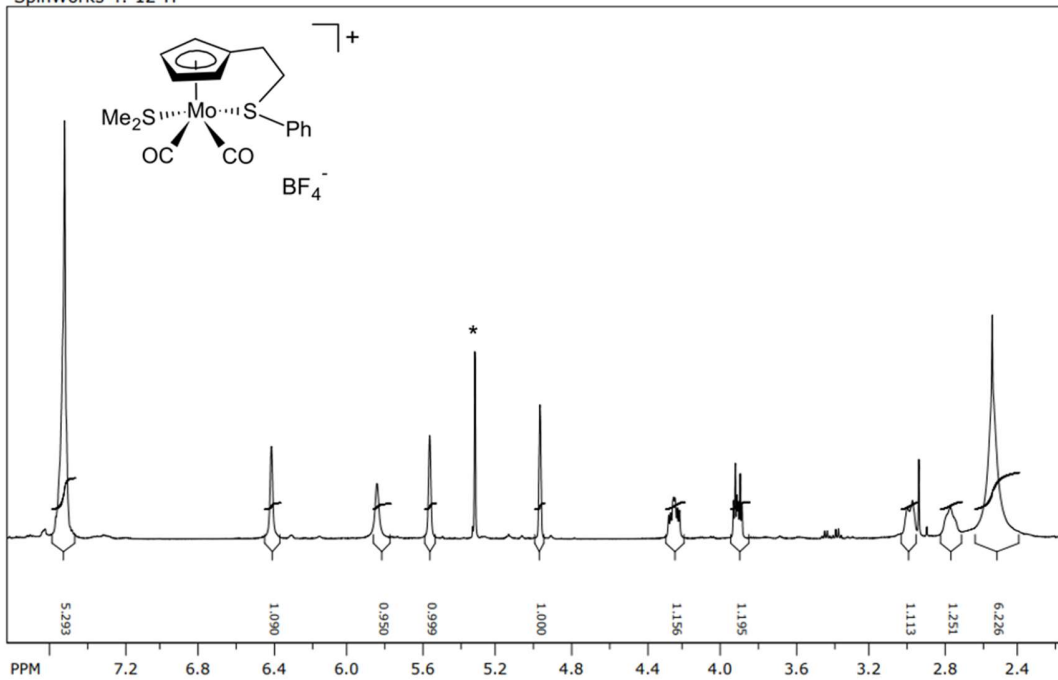

**Figure S26:** <sup>1</sup>H NMR spectrum of **12** in CD<sub>2</sub>Cl<sub>2</sub> (400 MHz).

SpinWorks 4: 12-C

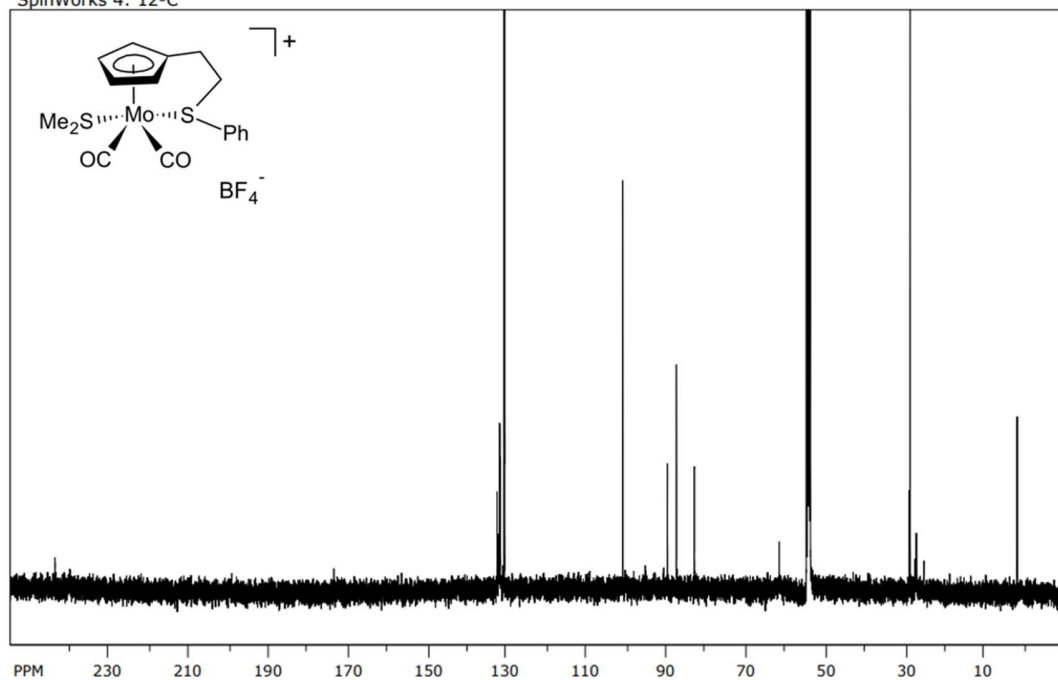

**Figure S27:** <sup>13</sup>C{<sup>1</sup>H} NMR spectrum of **12** in CD<sub>2</sub>Cl<sub>2</sub> (126 MHz).

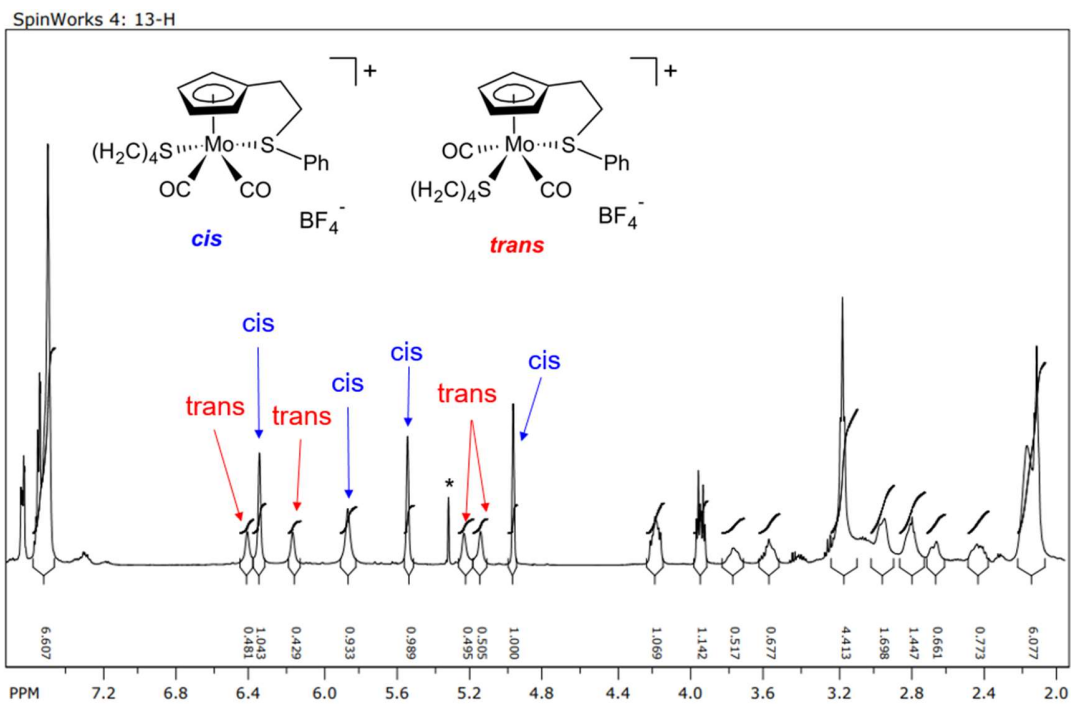

Figure S28:  $^1\text{H}$  NMR spectrum of **13** in  $\text{CD}_2\text{Cl}_2$  (500 MHz).

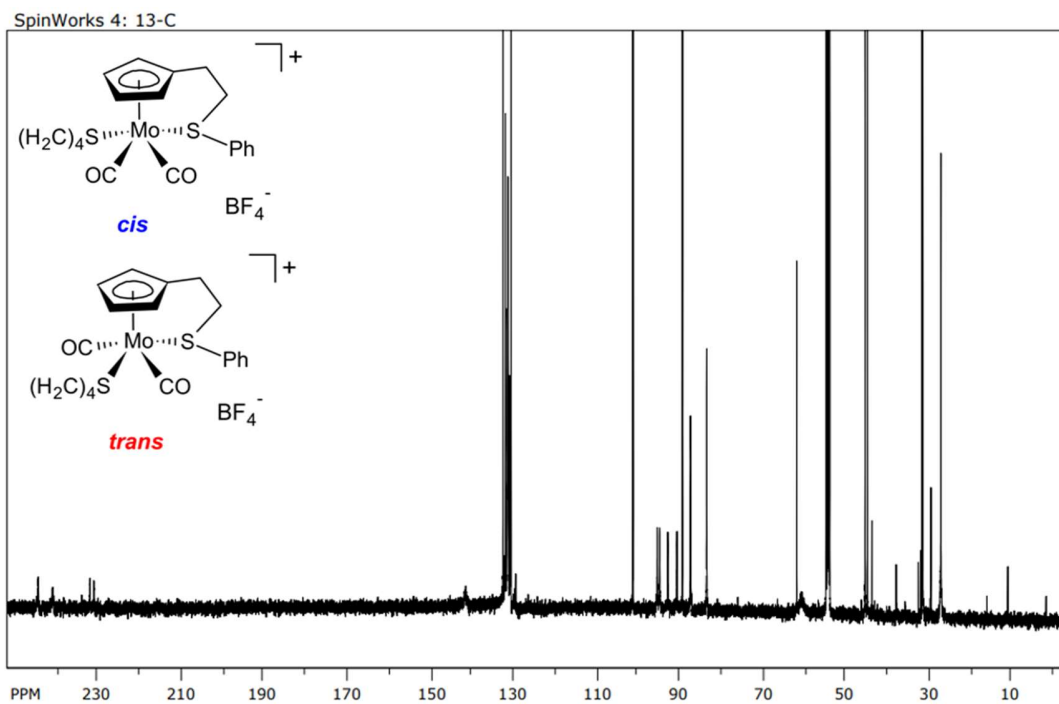

Figure S29:  $^{13}\text{C}\{^1\text{H}\}$  NMR spectrum of **13** in  $\text{CD}_2\text{Cl}_2$  (126 MHz).

SpinWorks 4: 14-H

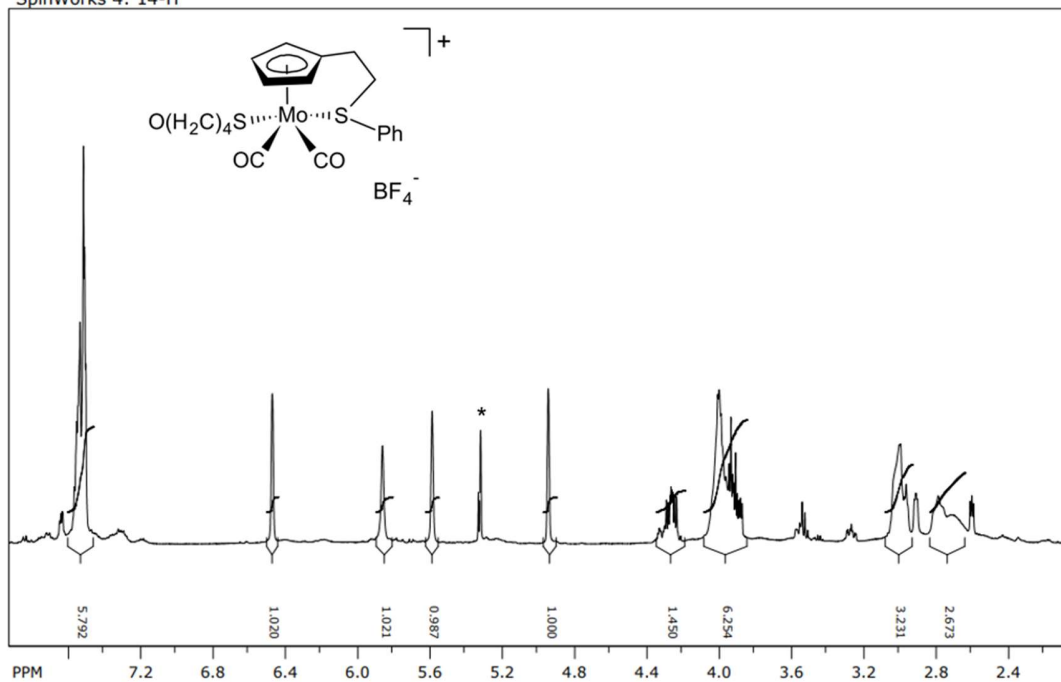

**Figure S30:** <sup>1</sup>H NMR spectrum of **14** in CD<sub>2</sub>Cl<sub>2</sub> (500 MHz).

SpinWorks 4: 14-C

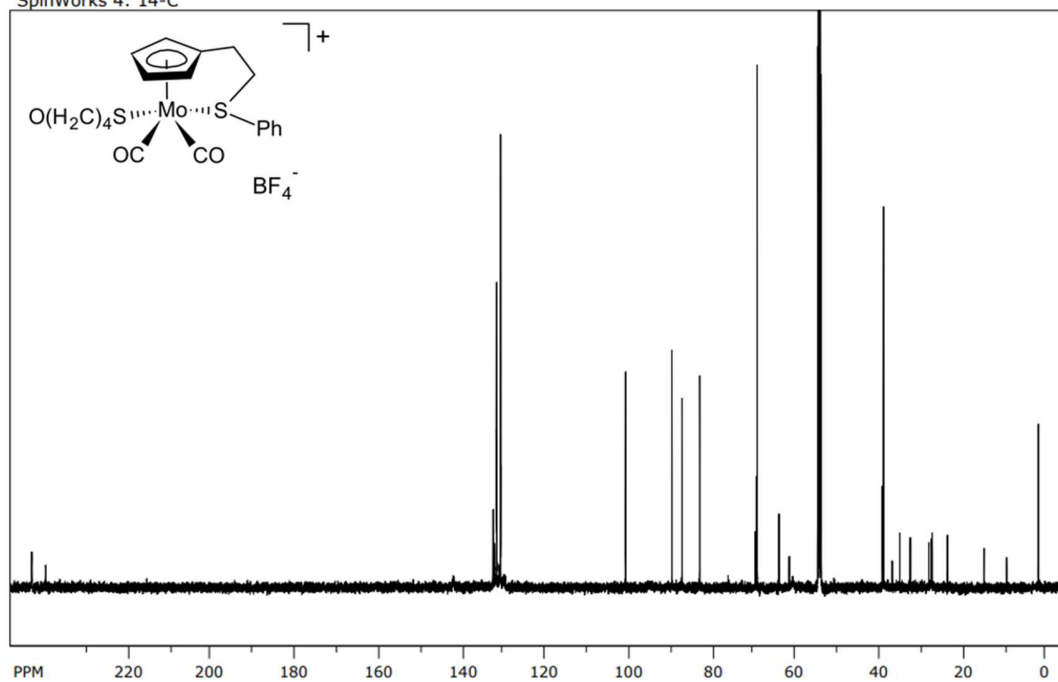

**Figure S31:** <sup>13</sup>C{<sup>1</sup>H} NMR spectrum of **14** in CD<sub>2</sub>Cl<sub>2</sub> (126 MHz).

SpinWorks 4: 15-H

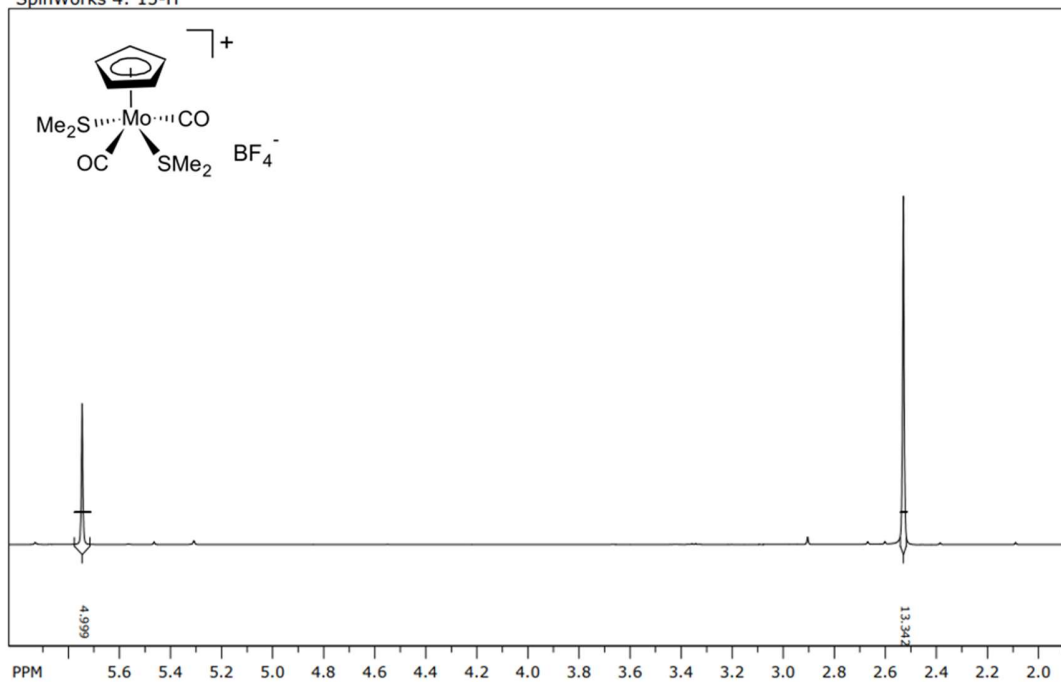

**Figure S32:**  $^1\text{H}$  NMR spectrum of **15** in  $\text{CD}_2\text{Cl}_2$  (500 MHz).

SpinWorks 4: 15-C

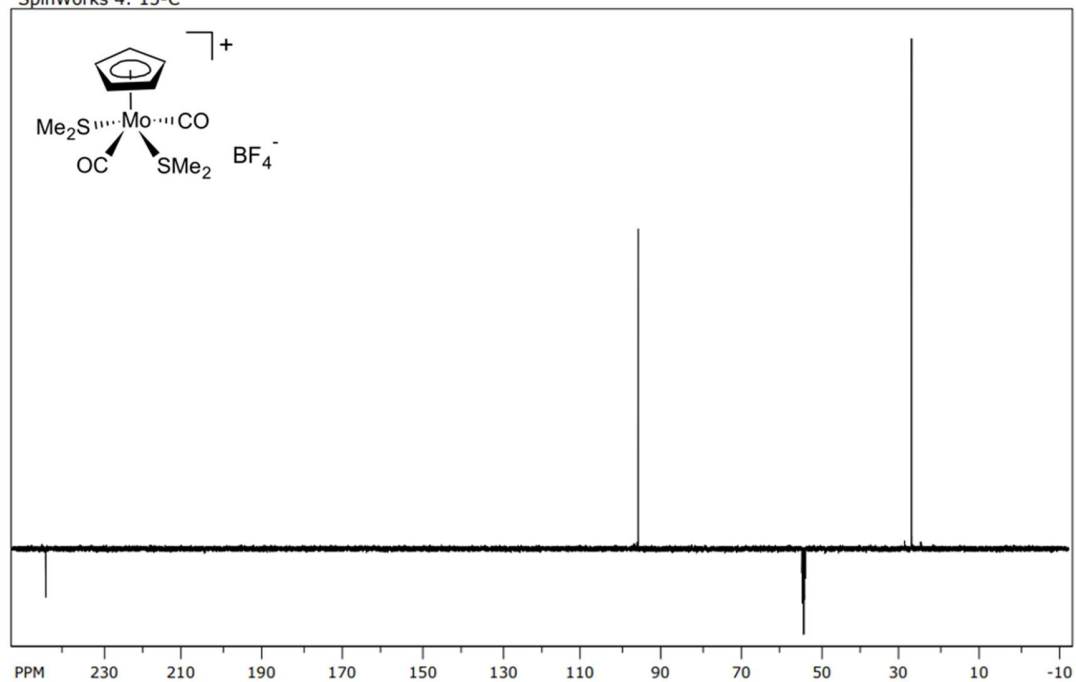

**Figure S33:**  $^{13}\text{C}$  APT NMR spectrum of **15** in  $\text{CD}_2\text{Cl}_2$  (126 MHz).

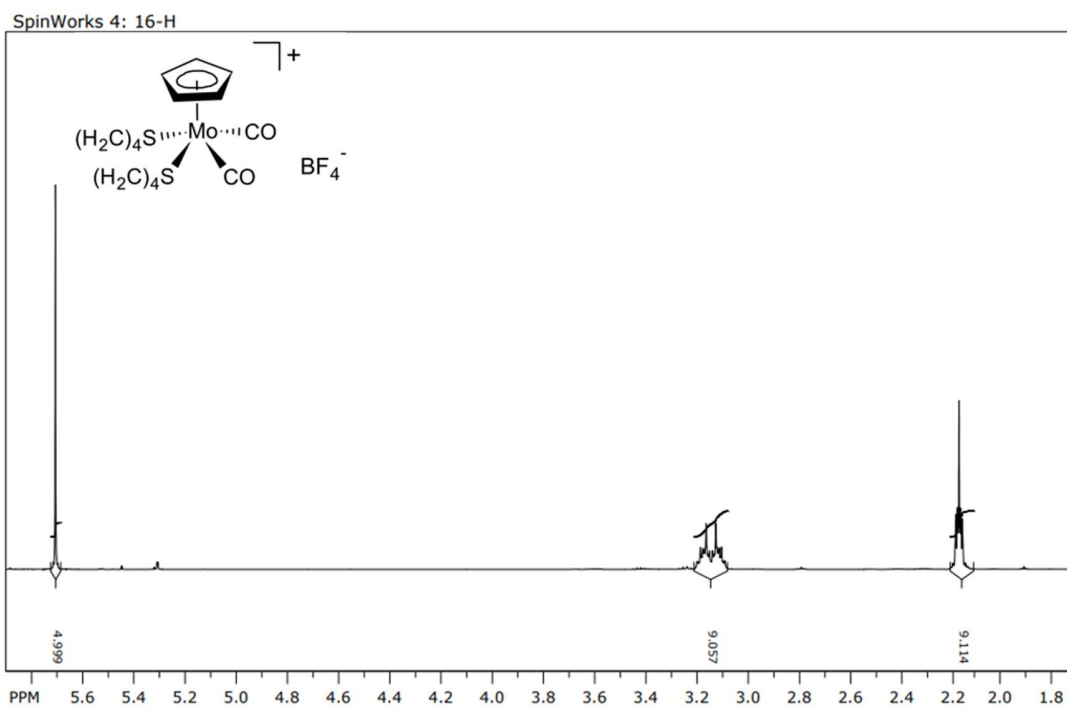

**Figure S34:**  $^1\text{H}$  NMR spectrum of **16** in  $\text{CD}_2\text{Cl}_2$  (500 MHz).

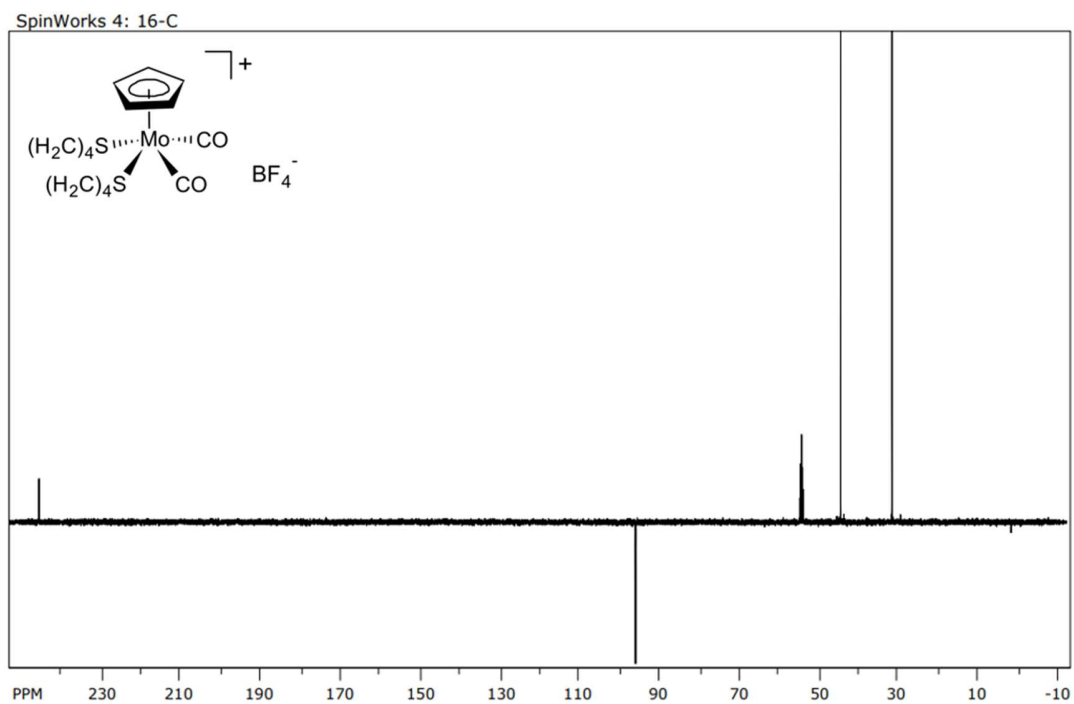

**Figure S35:**  $^{13}\text{C}$  APT NMR spectrum of **16** in  $\text{CD}_2\text{Cl}_2$  (126 MHz).

SpinWorks 4: 17-H

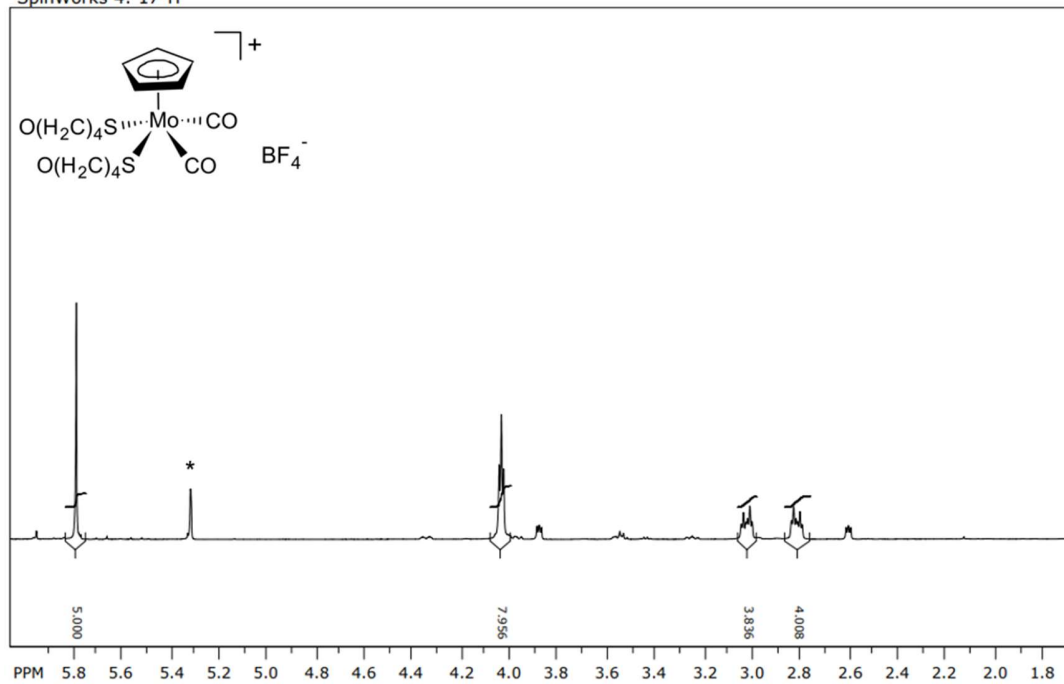

**Figure S36:** <sup>1</sup>H NMR spectrum of **17** in CD<sub>2</sub>Cl<sub>2</sub> (500 MHz).

SpinWorks 4: 17-C

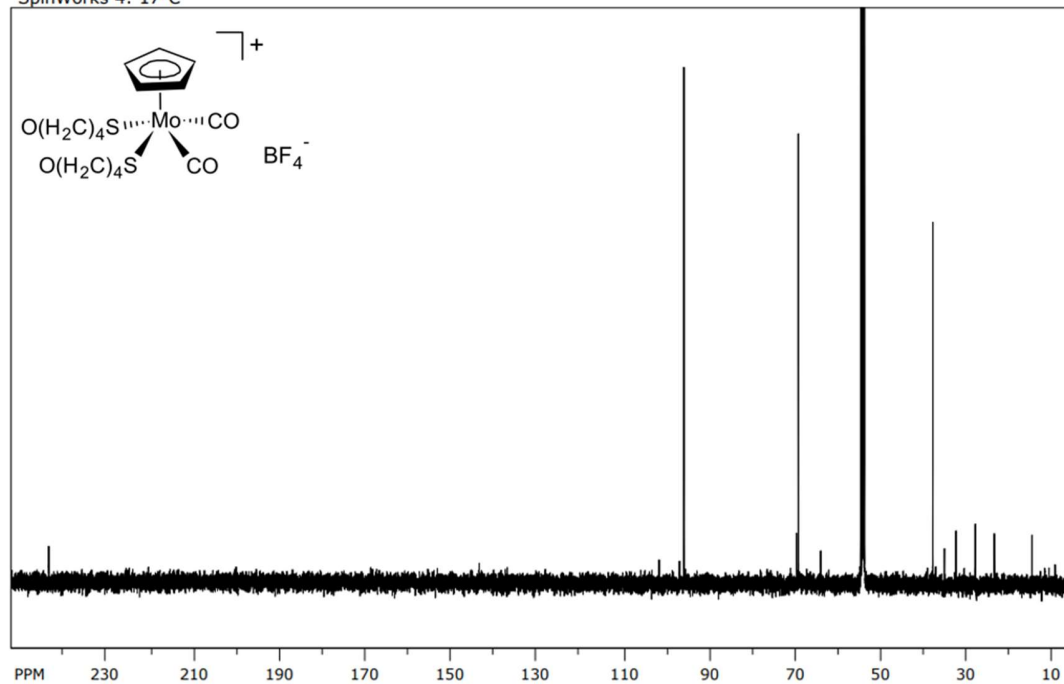

**Figure S37:** <sup>13</sup>C{<sup>1</sup>H} NMR spectrum of **17** in CD<sub>2</sub>Cl<sub>2</sub> (126 MHz).

SpinWorks 4: 18

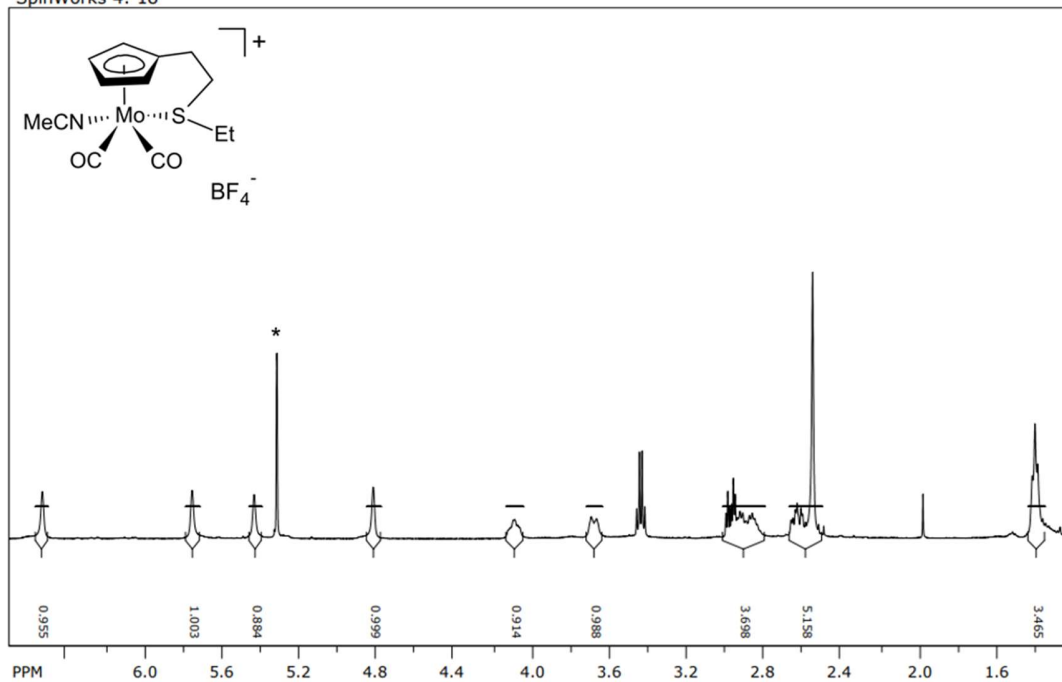

**Figure S38:**  $^1\text{H}$  NMR spectrum of **18** in  $\text{CD}_2\text{Cl}_2$  (500 MHz).

SpinWorks 4: 18-C

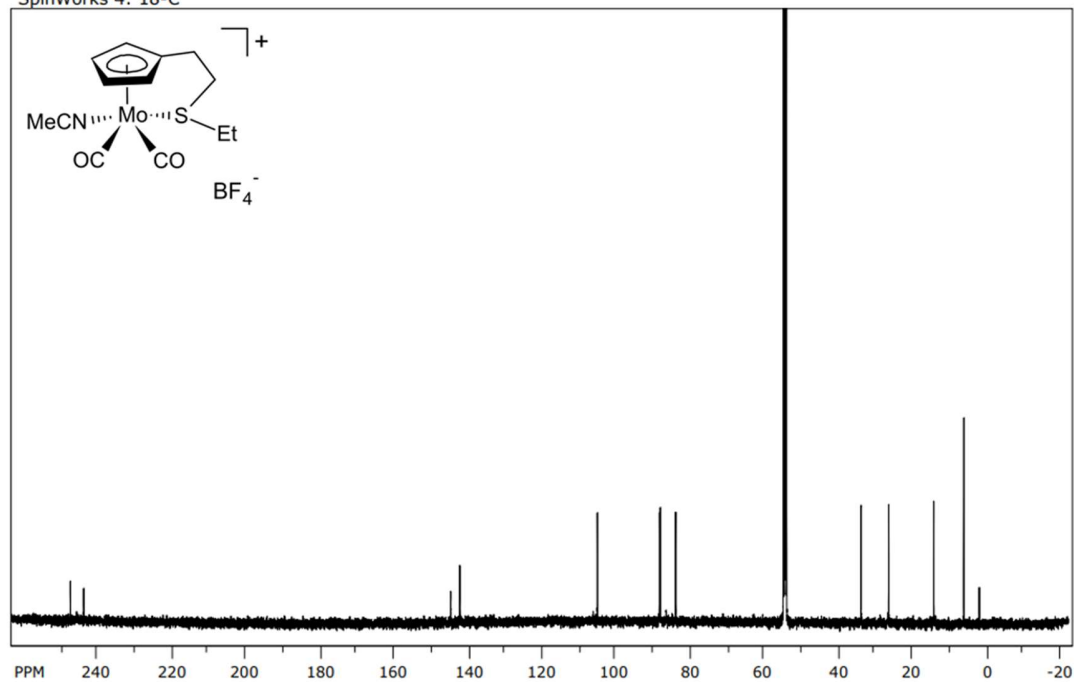

**Figure S39:**  $^{13}\text{C}\{^1\text{H}\}$  NMR spectrum of **18** in  $\text{CD}_2\text{Cl}_2$  (126 MHz).

SpinWorks 4: 19

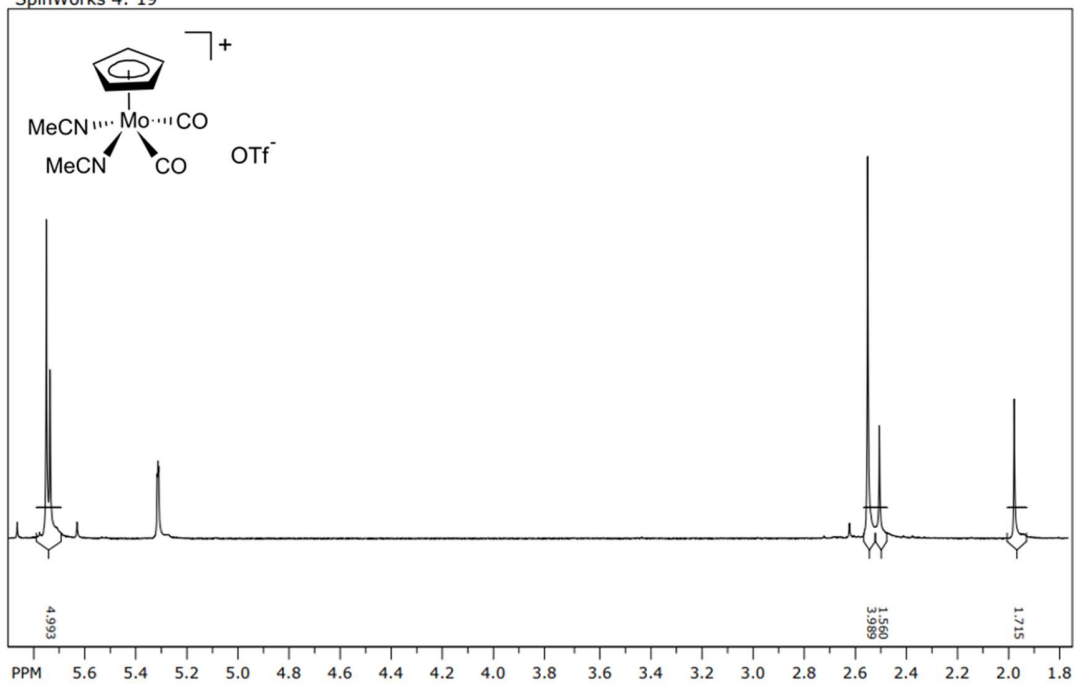

**Figure S40:**  $^1\text{H}$  NMR spectrum of **19** in  $\text{CD}_2\text{Cl}_2$  (400 MHz).
